# Supplementary material for: DC-SCRIPT is a novel regulator of the tumor suppressor gene CDKN2B and induces cell cycle arrest in ERα-positive breast cancer cells
Source: PubMed Central journal article supplement — Breast Cancer Res Treat. 2015 Feb 8;149(3):693–703. doi: 10.1007/s10549-015-3281-y (PMC4326655; doi:10.1007/s10549-015-3281-y), 2015-02-08
Supplement: 10549_2015_3281_MOESM1_ESM.pdf [file 10549_2015_3281_MOESM1_ESM.pdf]

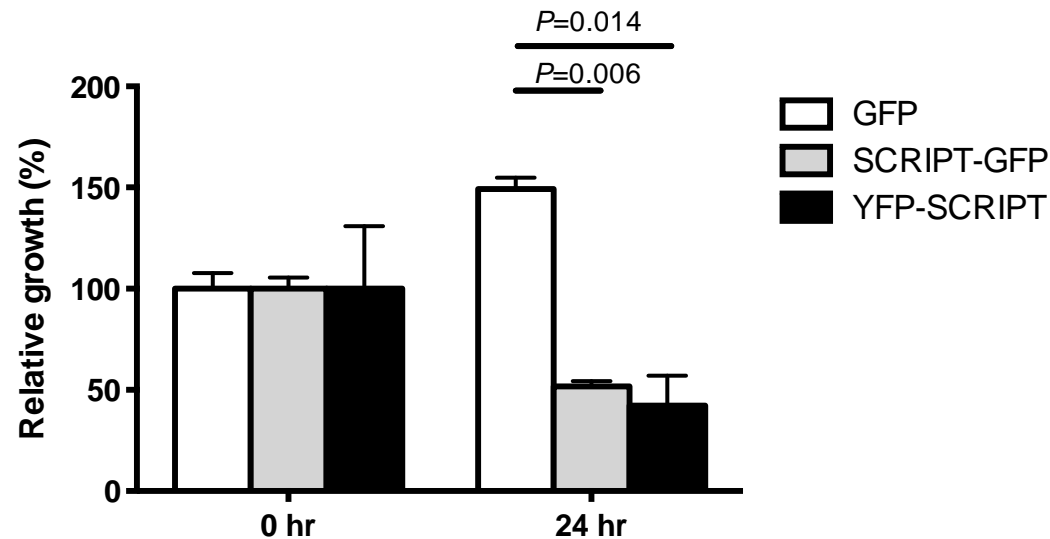

### Appendix A. DC-SCRIPT inhibits cell growth of CAMA-1 cells.

CAMA-1 (from ATCC) was cultured in RPMI supplemented with 10% FCS, 0.5% antibiotic-antimycotics and 2 mM ultraglutamine. CAMA-1 cells was transfected with pEYFP, pEGFP-DCSCRIPT or pEYFP-DCSCRIPT (as described in Ansems *et al.*, JNCI, 2010) using metafectene according to the manufacture's protocol. 16 hrs after transfection cells were washed and counted. Cells were again counted 24hrs later. After counting, cells were analyzed for GFP/YFP expression by means of FACS. Thereafter, the number of transfected cells was calculated. Number of cells plotted in the graph are relative to 0hr. (Data are expressed as the mean of 3 experiments +/- SEM. statistics: paired two-tailed student t test).

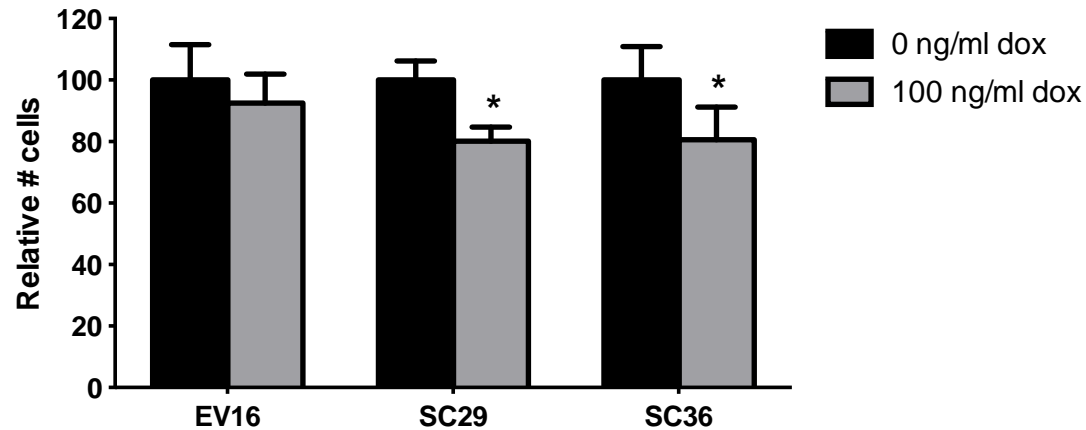

### Appendix B. DC-SCRIPT protein expression reduces cell growth *in vitro*

MCF7SC clones (29 and 36) and the negative control clone MCF7EV16 were cultured in the presence of 0 or 100 ng/mL doxycycline. Medium was refreshed every other day with new doxycycline. Cell numbers were counted at day 6 and cell numbers of 0 ng/mL treated cells in each experiment were set at 100%. (Data are expressed as the mean of 7 experiments +/- SEM). Statistics: paired two-tailed student t test.

**Appendix C. Induction of DC-SCRIPT in MCF7 breast cancer cells, downregulate many cell cycle related proteins in correspondence with primary breast tumor specimens**

In column 1, all 24 cell cycle related genes identified to correlate with DC-SCRIPT mRNA expression in breast cancer patients are shown. In column 2, the corresponding spearman correlation coefficient from the primary breast cancer specimens are shown. In column 3, the DC-SCRIPT-mediated difference of these genes in MCF7 are shown. The gene list has been sorted by DC-SCRIPT-mediated fold change in the MCF7 cells.

| Gene     | Spearman's Rs in patient specimens | Fold change by DC-SCRIPT-induction in MCF7 |
|----------|------------------------------------|--------------------------------------------|
| KRT18    | -0.37                              | -1.41                                      |
| DDA3     | -0.30                              | -1.37                                      |
| E2F1     | -0.32                              | -1.35                                      |
| KIF11    | -0.33                              | -1.27                                      |
| ZWINT    | -0.32                              | -1.23                                      |
| CKS2     | -0.30                              | -1.18                                      |
| CCNB1    | -0.34                              | -1.18                                      |
| ARL3     | -0.41                              | -1.18                                      |
| CHEK1    | -0.31                              | -1.15                                      |
| BUB3     | -0.34                              | -1.13                                      |
| HCAP-G   | -0.31                              | -1.12                                      |
| TUBG1    | -0.30                              | -1.10                                      |
| KIF22    | -0.29                              | -1.08                                      |
| PRC1     | -0.29                              | -1.06                                      |
| RAD54B   | -0.30                              | -1.06                                      |
| RAD51C   | -0.31                              | -1.03                                      |
| CCNE2    | -0.30                              | -1.02                                      |
| BRCA1    | -0.38                              | -1.01                                      |
| CDK2     | -0.35                              | 1.00                                       |
| RAN      | -0.31                              | 1.01                                       |
| CETN3    | -0.31                              | 1.02                                       |
| CKS1B    | -0.30                              | 1.02                                       |
| TIMELESS | -0.31                              | 1.04                                       |
| MAD2L1   | -0.34                              | 1.08                                       |

DC-SCRIPT is a novel regulator of the tumor suppressor gene *CDKN2B* and induces cell cycle arrest in breast cancer cells, Breast Cancer Research and Treatment, Ansems M, Søndergaard JN, Sieuwerts AM, Looman MWG, Smid M, de Graaf AMA, de Weerd V, Zuidscherwoude M, Foekens JA, Martens JWM, and Adema GJ. Department of Tumor Immunology, Radboud Institute for Molecular Life Sciences, Radboud University Medical Center. Gosse.Adema@radboudumc.nl.
